# Supplementary material
Source: publisher figshare collection journal article supplement (https://karger.figshare.com/articles/dataset/_/4004826)

A

Shared Haplotype by 9 and 11 Individuals on Chromosome 4

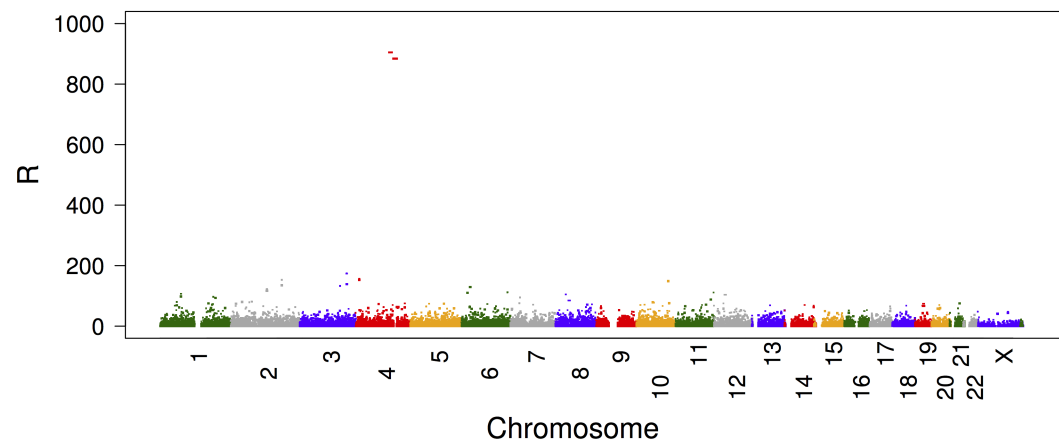

B

Shared Haplotype by 9 Individuals on Chromosome 5

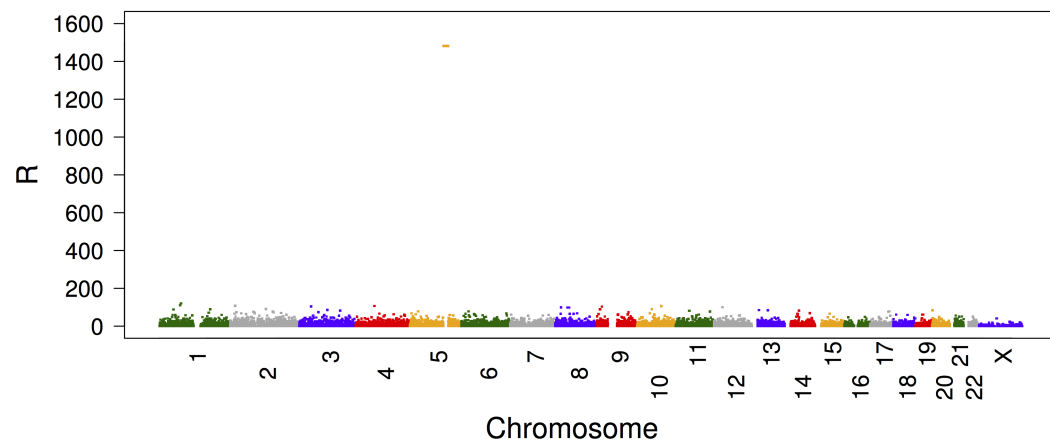

C

Shared Haplotype by 7 Individuals on Chromosome 5

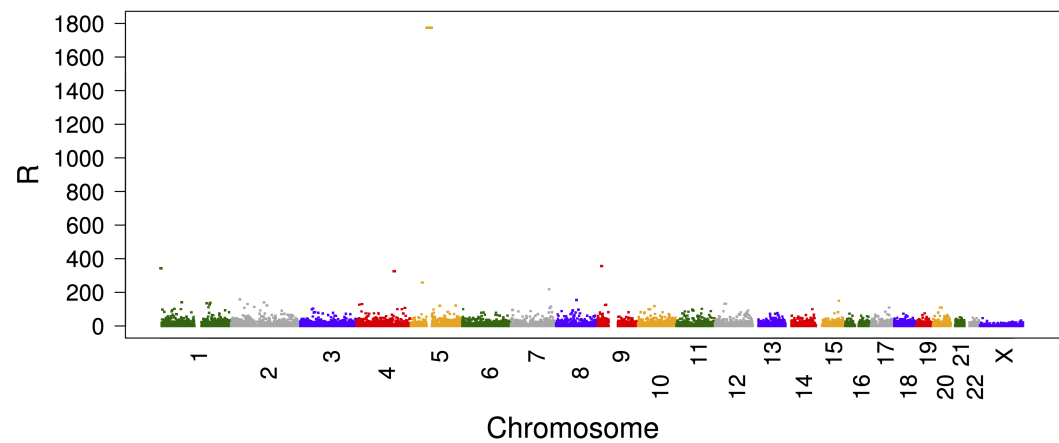

D

Shared Haplotype by 7 Individuals on Chromosome 4

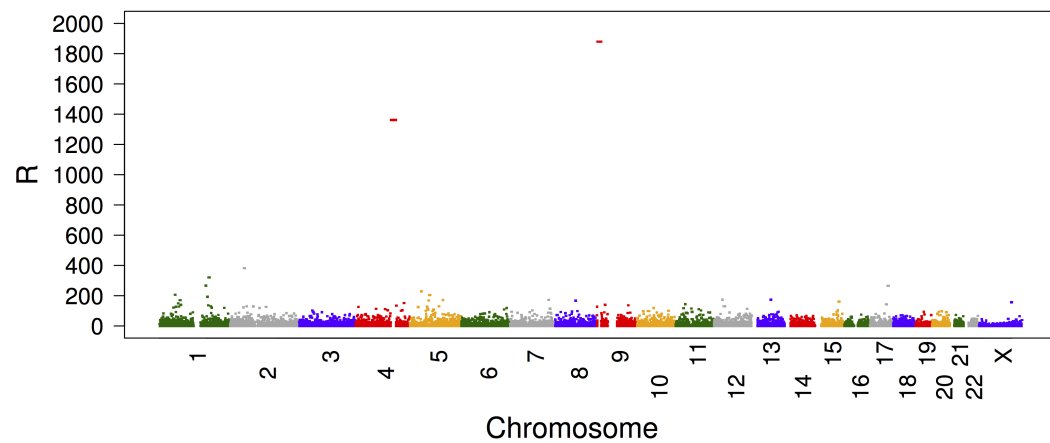

Supplement: Supplementary file 2 [file 1]
