# Supplementary material
Source: publisher figshare collection journal article supplement (https://karger.figshare.com/articles/dataset/_/4004826)

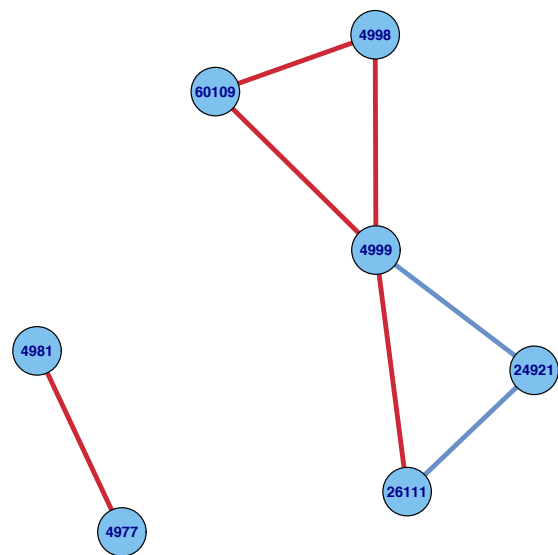

chr1:45003893-58996203

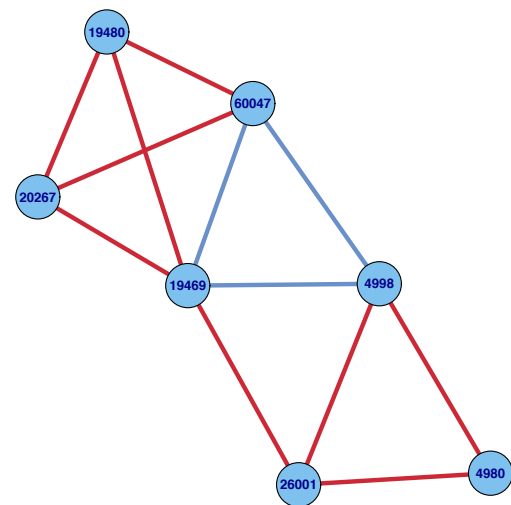

chr2:76000091-90116107

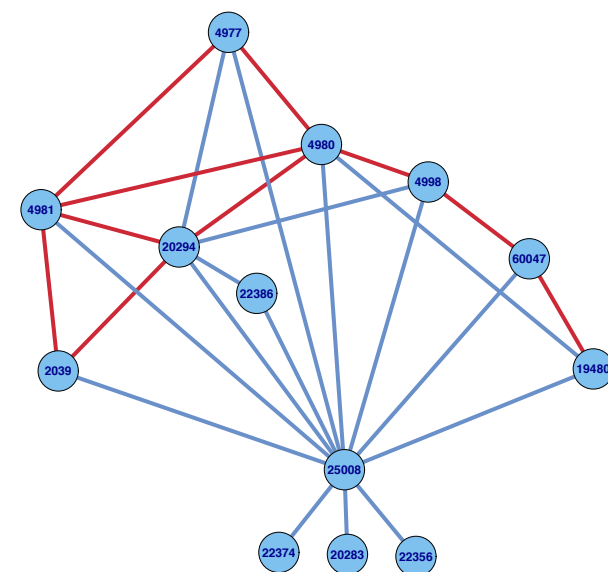

chr3:48057147-57905707

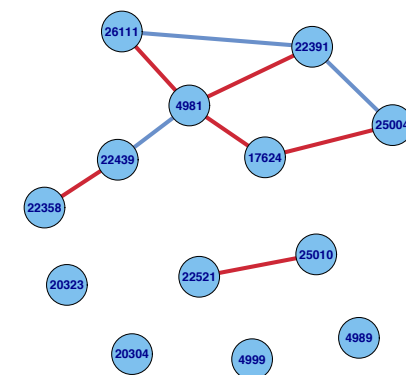

chr3:76005504-85964737

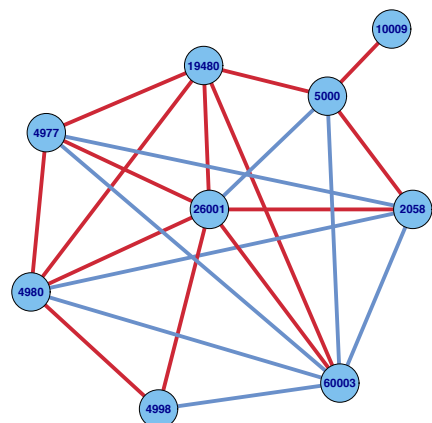

chr4:121Mb-137Mb

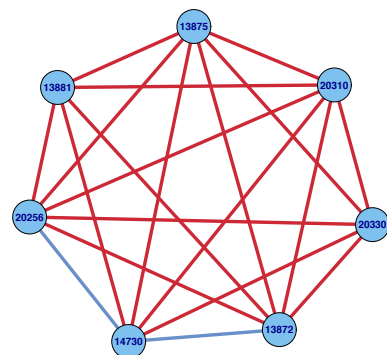

chr4:125Mb-139Mb

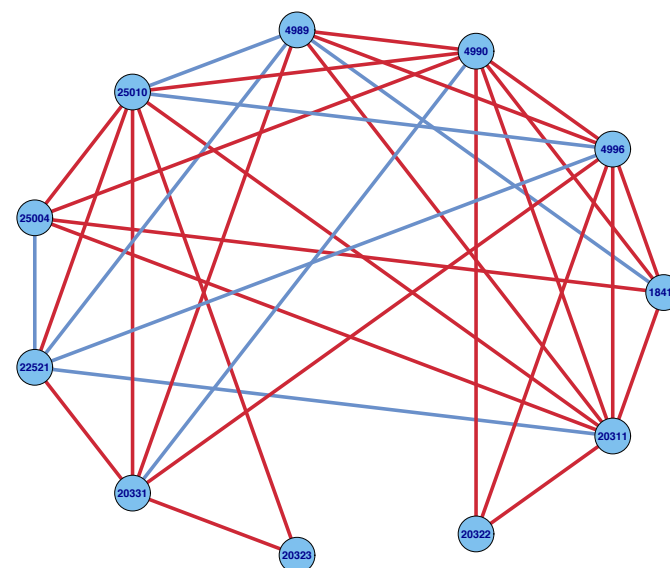

chr4:131005768-140996427

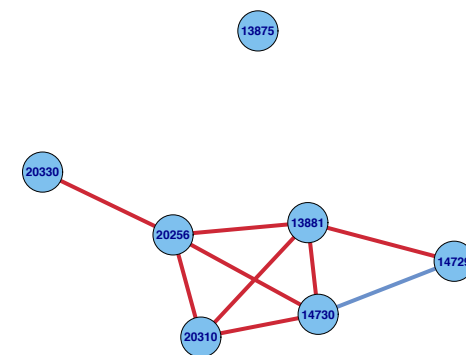

chr5:56Mb-73Mb

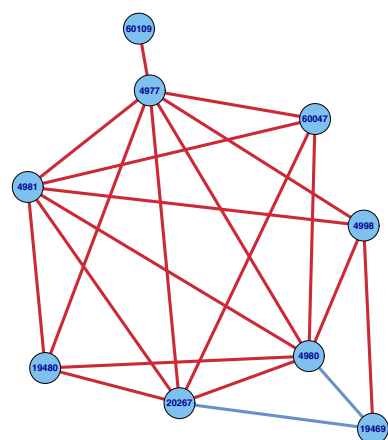

chr5:119Mb-134Mb

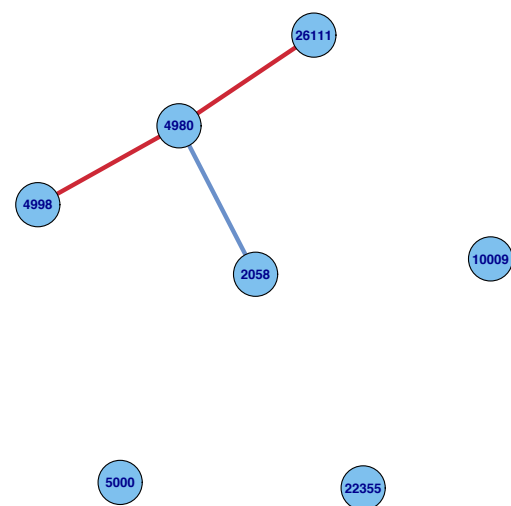

chr6:29010153-43999697

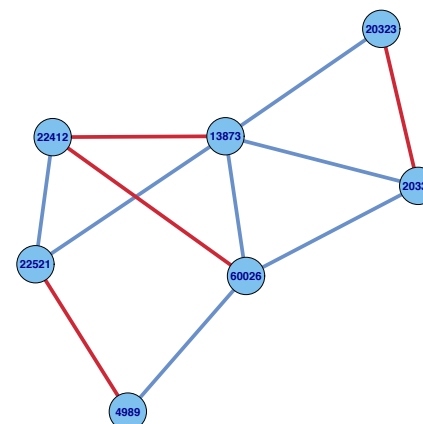

chr8:9009906-30997326

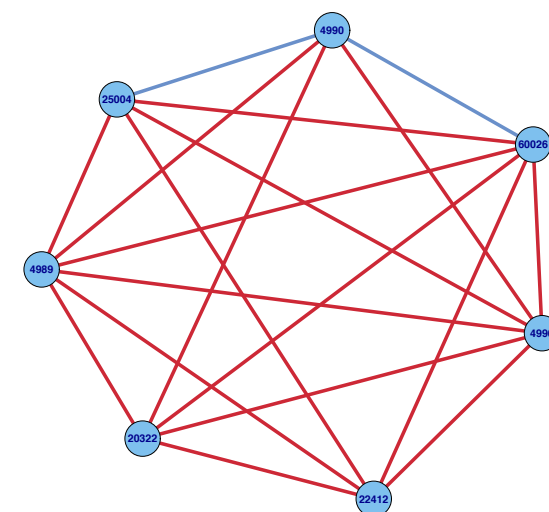

chr10:54501332-67493413

Supplement: Supplementary file 3 [file 1]
